# Supplementary material
Source: PubMed Central journal article supplement (PMC1283539)
Supplement: nar_33_20_6469__2.pdf [file nar_33_20_6469__2.pdf]

| Unique ID  | NCU        | Main FunCat              | Desc                          |
|------------|------------|--------------------------|-------------------------------|
| B14A6_060  | NCU01083.1 | METABOLISM               | S-adenosylmethionine decar    |
| 17E5_070   | NCU03737.1 | PROTEIN SYNTHESIS_S      | probable translation elongati |
| B2O8_210   | NCU01596.1 | PROTEIN FATE (folding, i | probable 26s proteasome p4    |
| B12F1_050  | NCU03439.1 | UNCLASSIFIED PROTEIN     | conserved hypothetical prote  |
| B11N2_080  | NCU03637.1 | CELL FATE_CELL TYPE      | probable zinc metallo-protea  |
| 90C4_230   | NCU00768.1 | TRANSCRIPTION            | related to polyadenylate-bind |
| 93G11_050  | NCU03766.1 | SUBCELLULAR LOCALIZ      | probable U6 SNRNA-ASSOC       |
| 12F11_090  | NCU01328.1 | ENERGY                   | probable TRANSKETOLASE        |
| 7F4_360    | NCU06713.1 | UNCLASSIFIED PROTEIN     | conserved hypothetical prote  |
| B19C19_060 | NCU03395.1 | CELLULAR TRANSPORT       | H+-transporting ATPase, vac   |
| 9G6_070    | NCU04150.1 | CELL CYCLE AND DNA F     | probable MAK16 protein        |
| 65E11_080  | NCU01305.1 | BIOGENESIS OF CELLUL     | related to membrane protein   |
| B7A16_160  | NCU04164.1 | UNCLASSIFIED PROTEIN     | conserved hypothetical prote  |
| B1O14_280  | NCU02472.1 | CELLULAR TRANSPORT       | NADH dehydrogenase (ubiqui    |
| NCU06556.1 | NCU06556.1 | CELL RESCUE, DEFENS      | probable thioredoxin          |
| NCU05008.1 | NCU05008.1 | ENERGY_METABOLISM_       | NADH2 dehydrogenase (ubiq     |
| B2J23_070  | NCU02027.1 | METABOLISM               | related to lysophospholipase  |

| Unique ID  | NCU        | Main FunCat              | Desc                            |
|------------|------------|--------------------------|---------------------------------|
| 123A4_170  | NCU01163.1 | UNCLASSIFIED PROTEIN     | conserved hypothetical prote    |
| B15B10_160 | NCU04770.1 | SUBCELLULAR LOCALIZ      | probable TRANSCRIPTION          |
| NCU06454.1 | NCU06454.1 | CELL CYCLE AND DNA F     | probable GTP binding protei     |
| NCU03292.1 | NCU03292.1 | CELLULAR TRANSPORT       | putative calcium P-type ATP;    |
| NCU06493.1 | NCU06493.1 | CELLULAR COMMUNICA       | G protein alpha chain           |
| B13D15_150 | NCU01981.1 | PROTEIN SYNTHESIS        | probable translation initiation |
| B14D6_540  | NCU06761.1 | METABOLISM               | probable sphingosine-1-phos     |
| B24N4_120  | NCU08744.1 | TRANSCRIPTION            | related to regulatory protein ( |
| 18F11_030  | NCU01213.1 | CELL RESCUE, DEFENS      | manganese superoxide dism       |
| NCU10028.1 | NCU10028.1 | UNCLASSIFIED PROTEIN     | putative protein                |
| NCU02549.1 | NCU02549.1 | PROTEIN FATE (folding, i | mitochondrial processing pe     |
| NCU08344.1 | NCU08344.1 | PROTEIN SYNTHESIS_S      | probable ribosomal protein L    |
| NCU06432.1 | NCU06432.1 | PROTEIN SYNTHESIS        | probable 40S ribosomal prot     |
| B7N14_030  | NCU03565.1 | PROTEIN SYNTHESIS        | probable ribosomal protein L    |
| NCU02181.1 | NCU02181.1 | PROTEIN SYNTHESIS        | probable ribosomal protein S    |
| B17B1_040  | NCU06843.1 | PROTEIN SYNTHESIS        | probable 60s ribosomal prote    |
| B21D9_030  | NCU01776.1 | PROTEIN SYNTHESIS_S      | probable ribosomal protein L    |
| NCU07408.1 | NCU07408.1 | PROTEIN SYNTHESIS_P      | 60S acidic ribosomal protein    |
| B8G12_400  | NCU07182.1 | PROTEIN SYNTHESIS        | probable 40S RIBOSOMAL F        |
| 71B5_080   | NCU09345.1 | METABOLISM               | probable thiamine repressed     |
| B8B20_320  | NCU05430.1 | ENERGY_INTERACTION       | H+-transporting ATP synthas     |
| 5C2_020    | NCU03151.1 | CLASSIFICATION NOT Y     | probable peroxisomal memb       |
| NCU08340.1 | NCU08340.1 | PROTEIN ACTIVITY REG     | probable ADP-ribosylation fa    |
| B14D6_160  | NCU06804.1 | METABOLISM               | related to phenol 2-monooxy     |
| NCU02160.1 | NCU02160.1 | CELLULAR COMMUNICA       | probable GTP-binding protei     |

| <b>Cluster</b> | <b>Dictyo orthologs</b> | <b>Dictyo cluster (Xu et al., 2004)</b> |
|----------------|-------------------------|-----------------------------------------|
| Max0.5         | SLE633                  | I                                       |
| Max1~4         | SLB469                  | I                                       |
| Min0~0.5       | SLF270                  | I                                       |
| Min0~0.5       | SLH404                  | I                                       |
| Min0~0.5       | SSC506                  | I                                       |
| Max0.5         | SSH321                  | II                                      |
| Max1~4         | SSM647                  | II                                      |
| Min0~0.5       | SLA731                  | II                                      |
| Min0~0.5       | SSA242                  | II                                      |
| Min0~0.5       | SSI279                  | II                                      |
| Max1           | CMP10_A04               | III                                     |
| Max1           | SLI236                  | III                                     |
| Max1           | SSG642                  | III                                     |
| Max8~16        | SSH882                  | III                                     |
| Min0~0.5       | SLA657                  | III                                     |
| Min0~0.5       | SSF643                  | III                                     |
| other          | SSA104                  | III                                     |

| <b>Cluster</b> | <b>Ustilago ortholog</b> | <b>Ustilago (Zahiri et al., 2005)</b> |
|----------------|--------------------------|---------------------------------------|
| Max0.5         | UM06048.1                | 11h down                              |
| Max0.5         | UM02394.1                | 11h down                              |
| Max1           | UM00295.1                | 11h down                              |
| Max1           | UM04461.1                | 11h down                              |
| Max1~4         | UM05123.1                | 11h down                              |
| Min0~0.5       | UM02665.1                | 11h down                              |
| Min0~0.5       | UM05120.1                | 11h down                              |
| Min0~0.5       | UM06385.1                | 11h down                              |
| other          | UM03085.1                | 11h down                              |
| other          | UM04553.1                | 11h down                              |
| Max1~4         | UM05993.1                | 11h up                                |
| Max1~4         | UM00198.1                | 11h up                                |
| Max1~4         | UM01318.1                | 11h up                                |
| Max1~4         | UM04855.1                | 11h up                                |
| Max1~4         | UM02714.1                | 11h up                                |
| Max1~4         | UM03846.1                | 11h up                                |
| Max1~4         | UM04635.1                | 11h up                                |
| Max1~4         | UM06055.1                | 11h up                                |
| Max1~4         | UM02515.1                | 11h up                                |
| Max8~16        | UM00816.1                | 11h up                                |
| Min0~0.5       | UM03191.1                | 11h up                                |
| Min0~0.5       | UM02947.1                | 11h up                                |
| Min0~0.5       | UM00387.1                | 11h up                                |
| Max1~4         | UM00640.1                | 4h down                               |
| Min0~0.5       | UM00774.1                | 4h up                                 |
